# Supplementary material for: Disordered Regions of Mixed Lineage Leukemia 4 (MLL4) Protein Are Capable of RNA Binding
Source: PubMed Central journal article supplement (PMC6274713; doi:10.3390/ijms19113478), 2018-11-05

# Supplementary figure 1

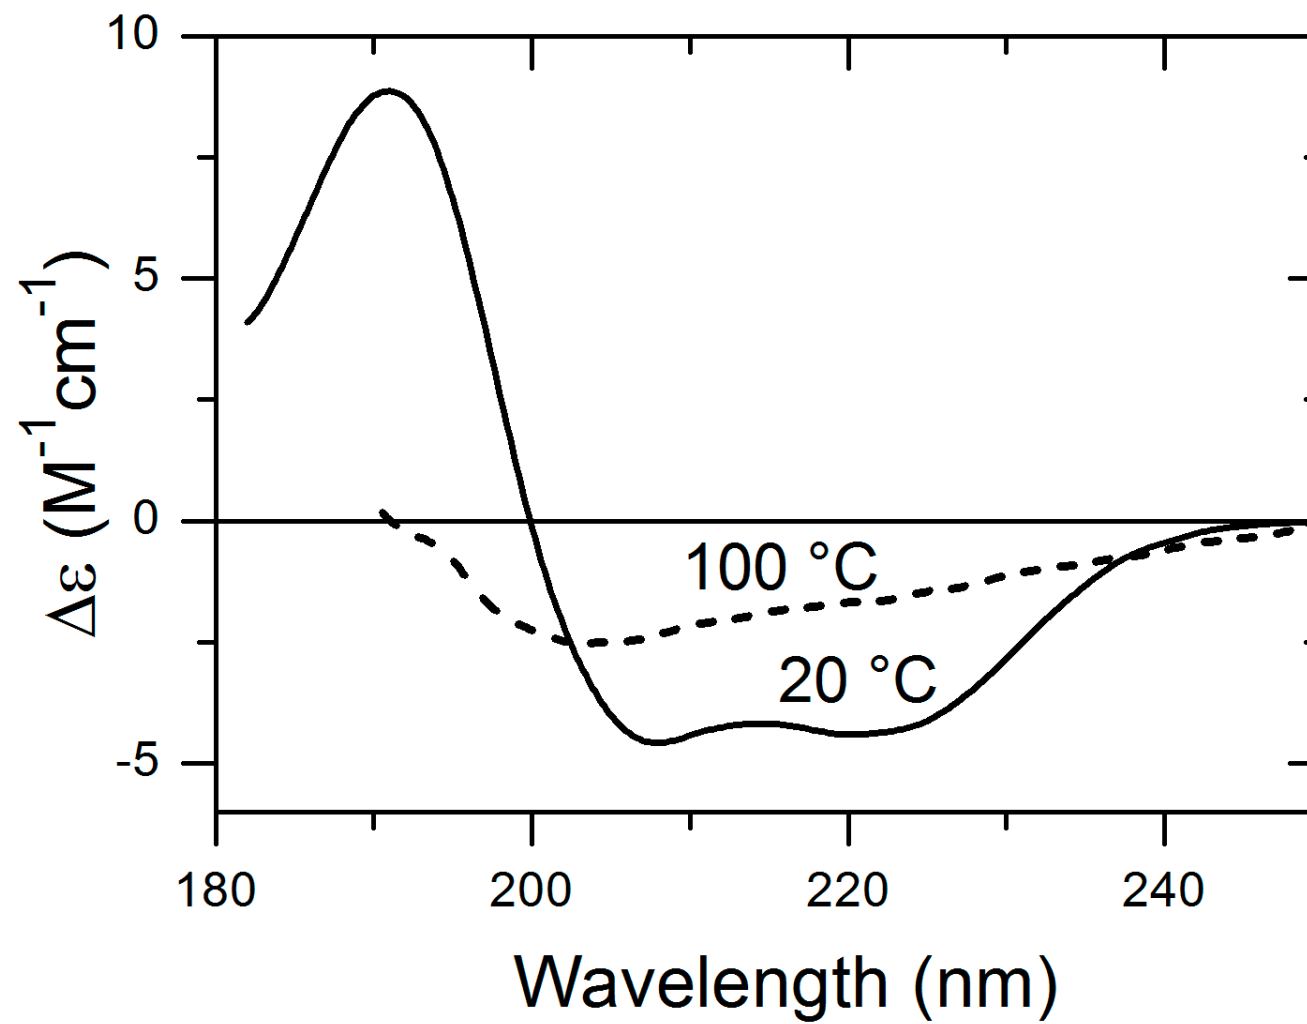

## Supplementary figure 2

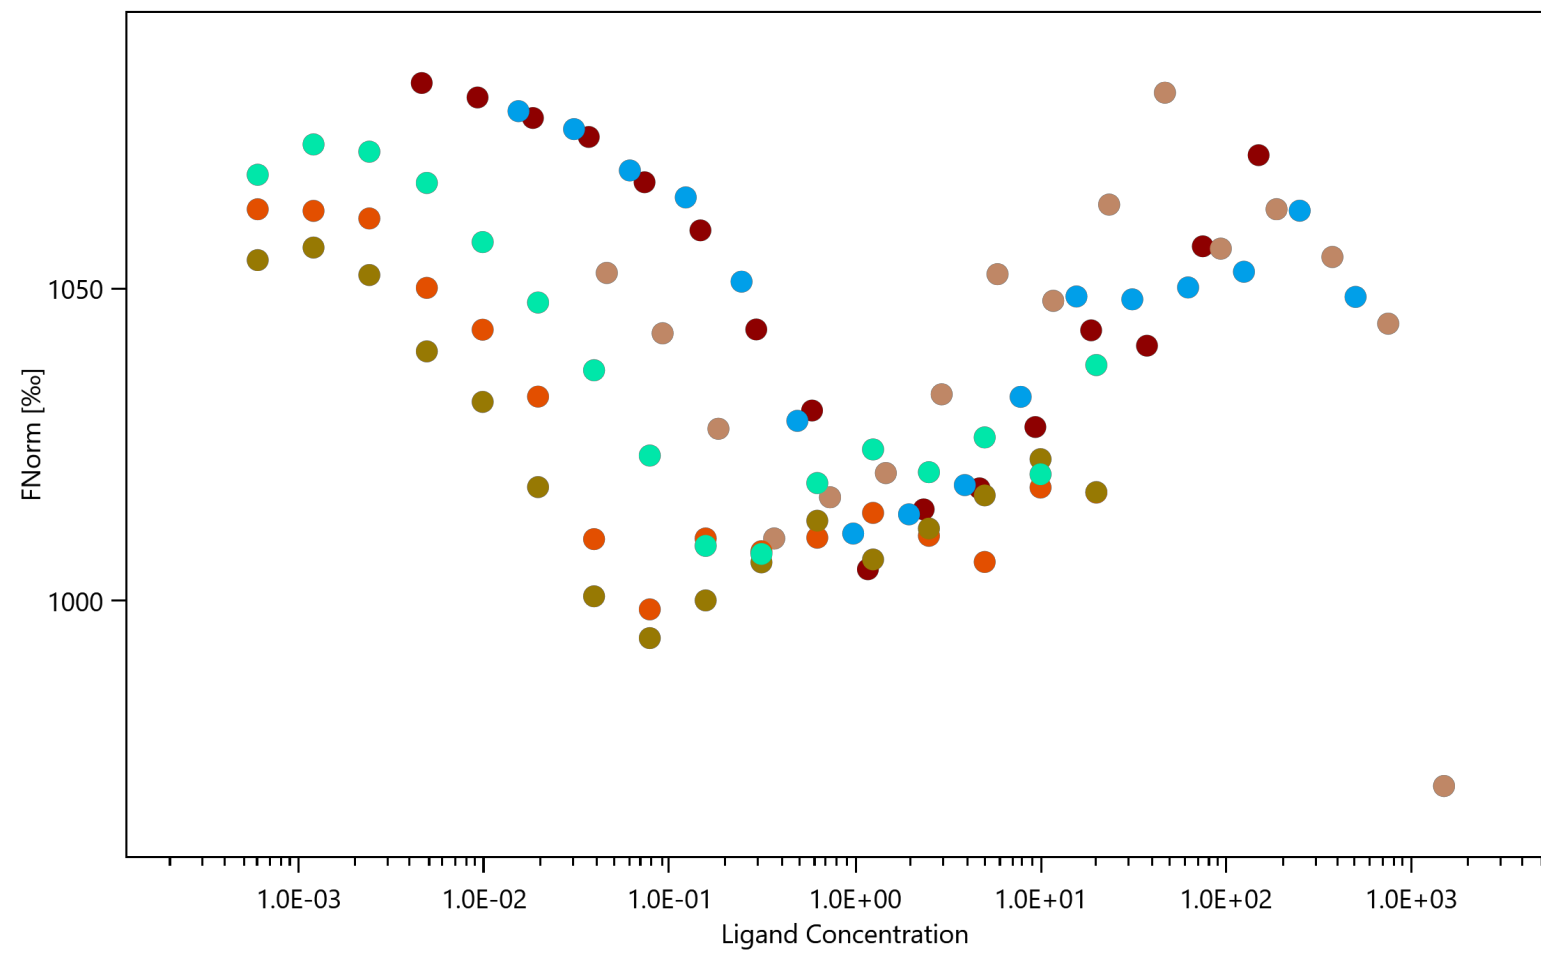

# Supplementary figure 3

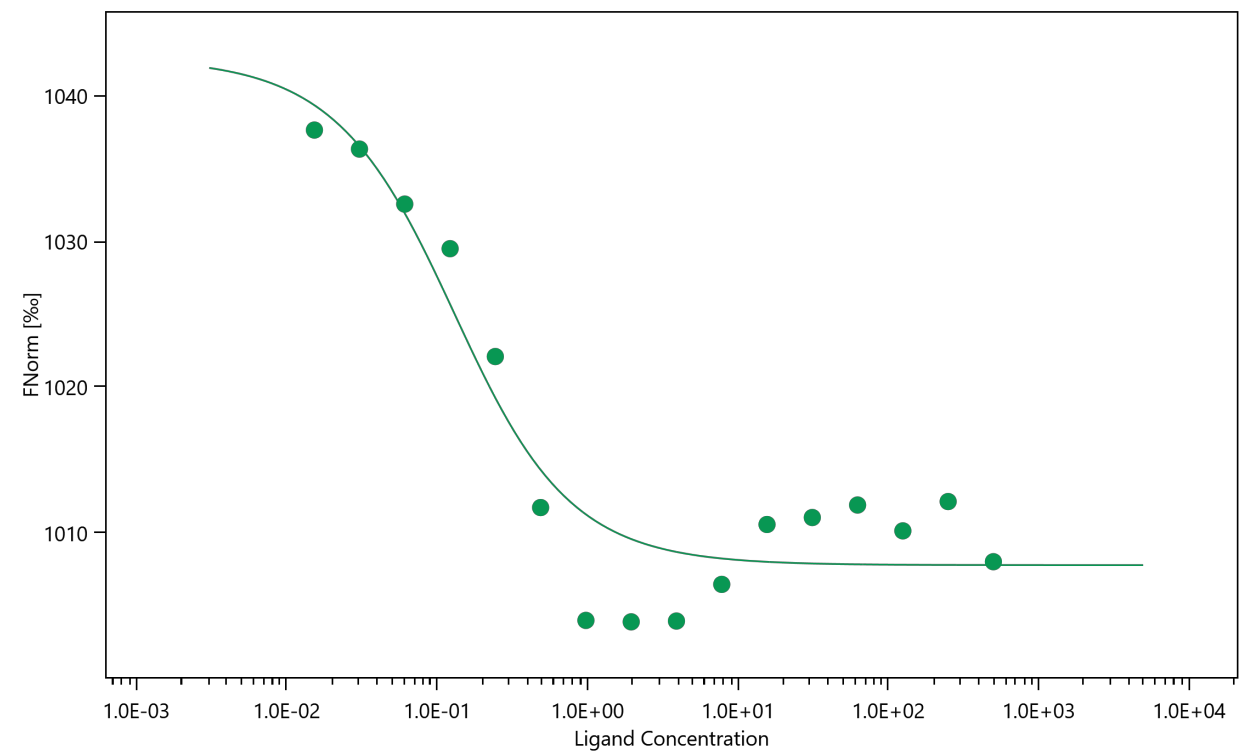

# Supplementary figure 4

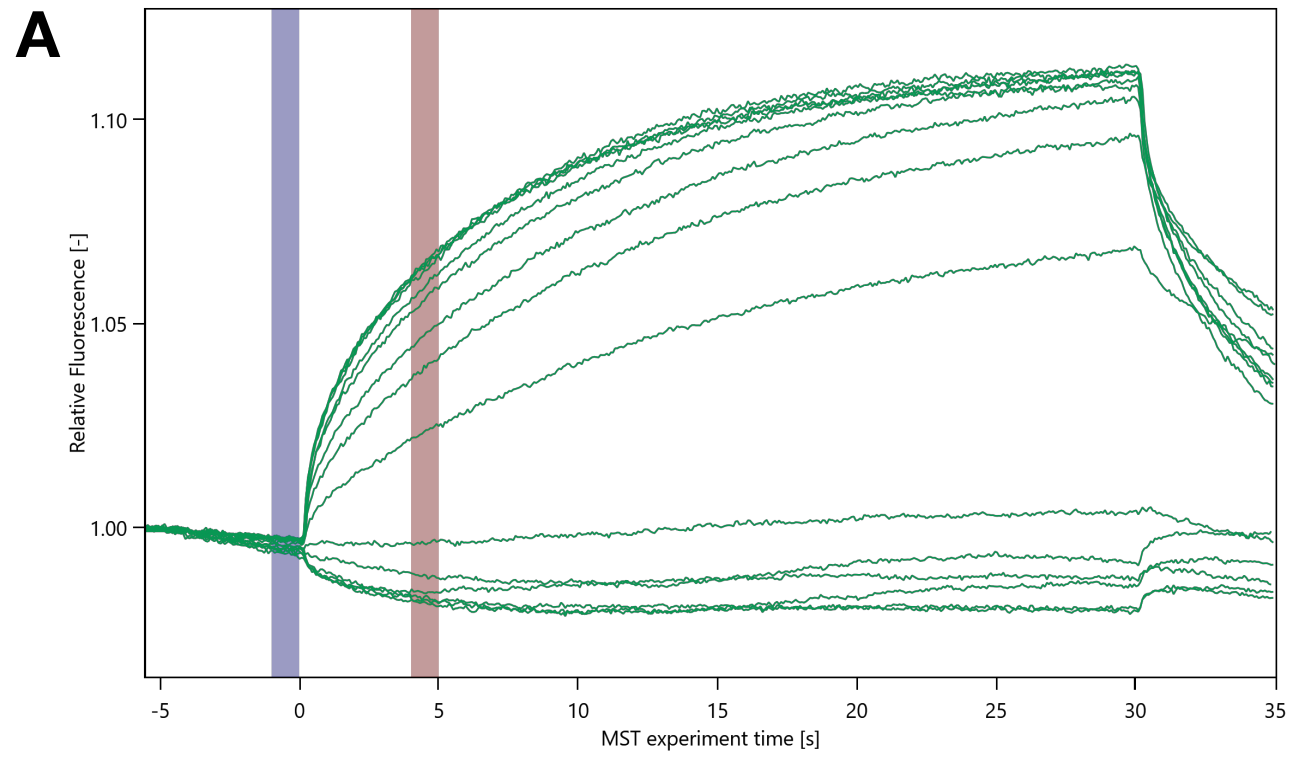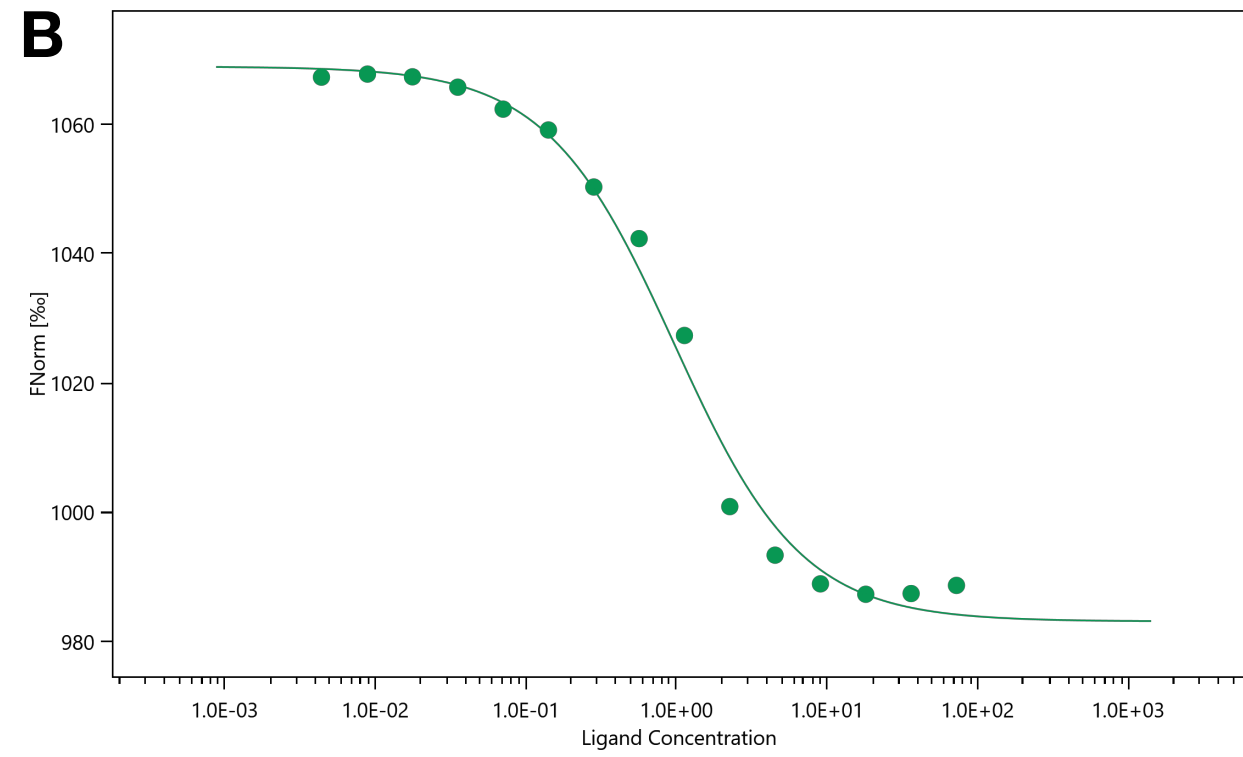

# Supplementary figure 5

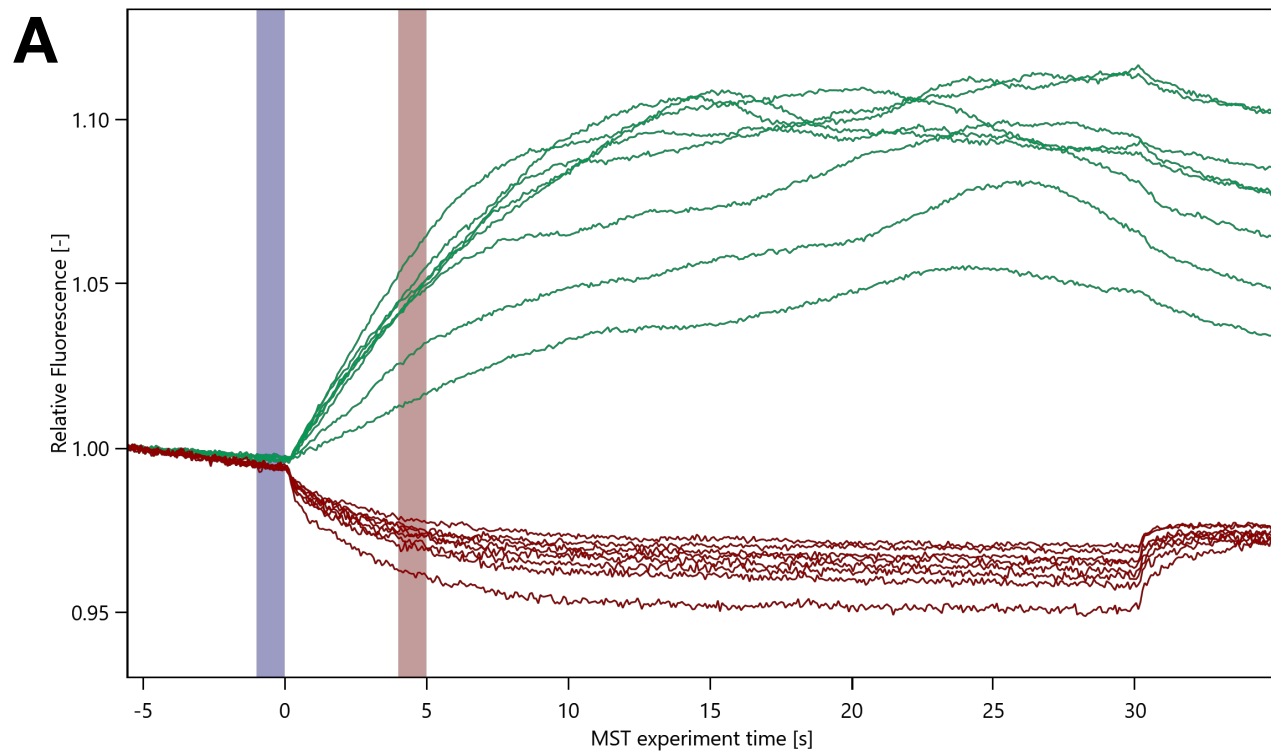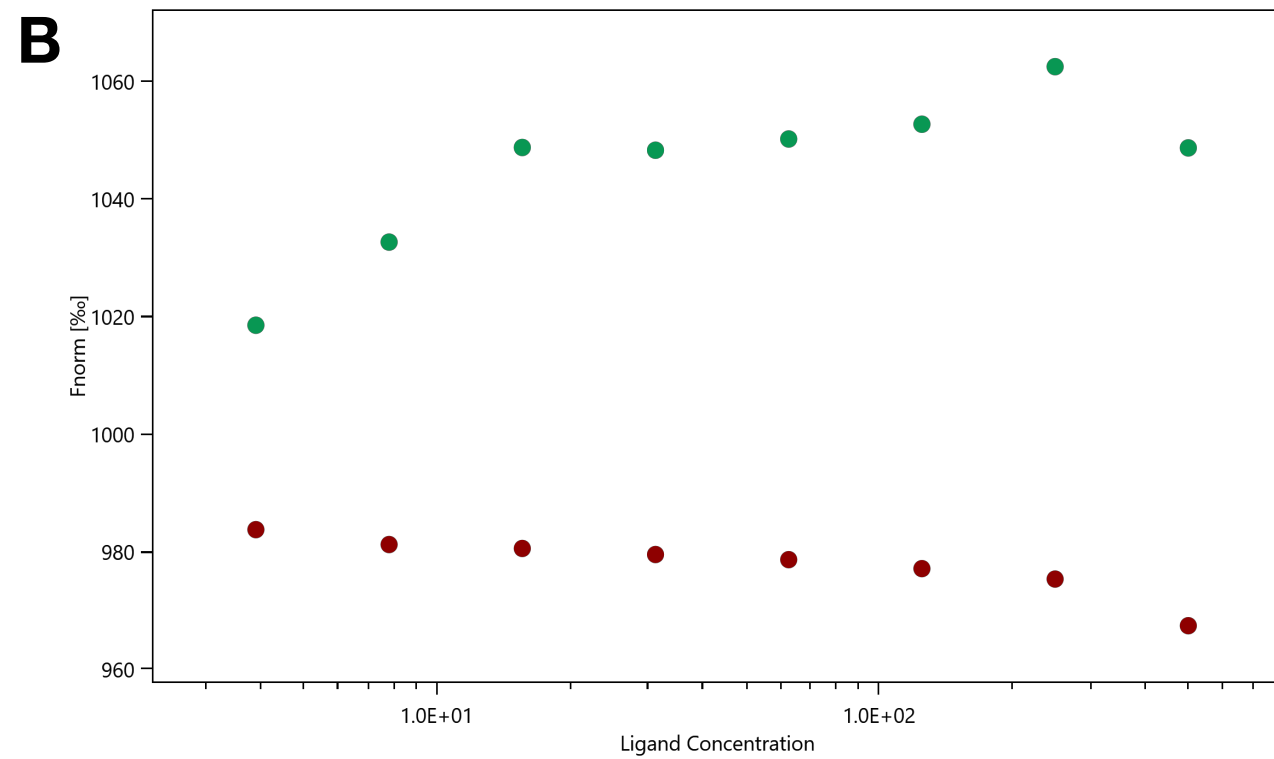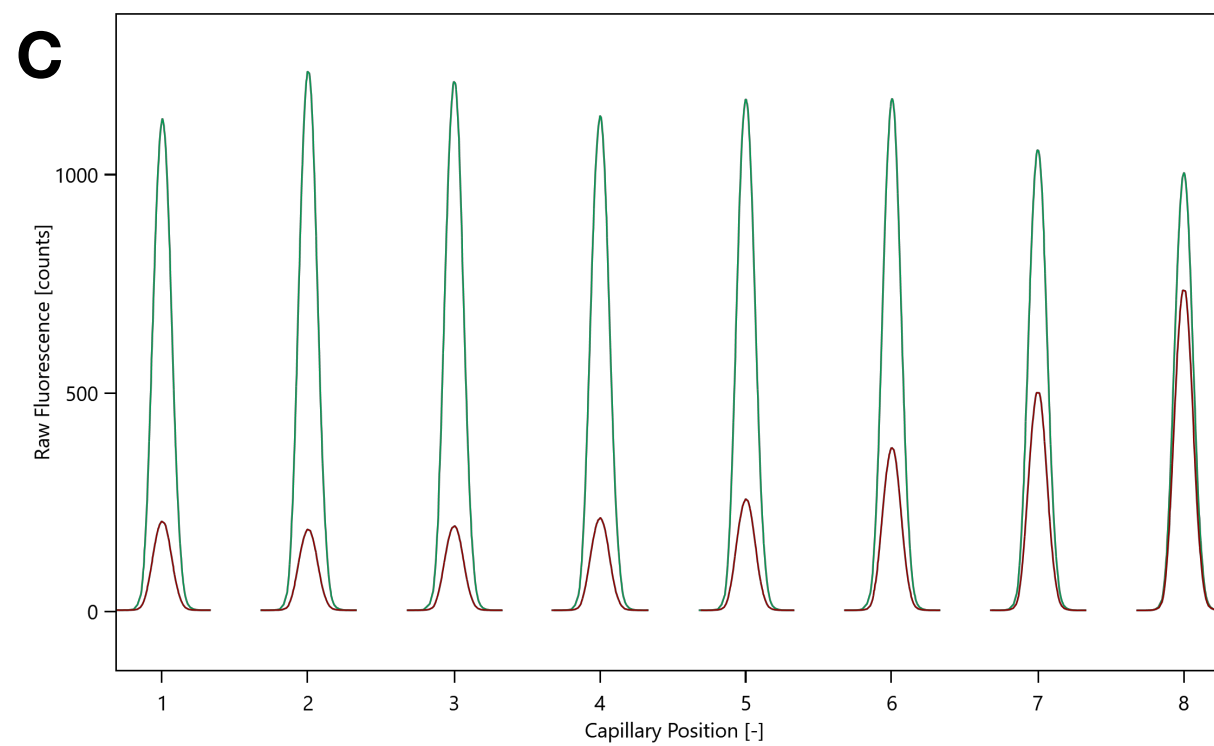

## Supplementary figure 6

|                                           |      |      |      |
|-------------------------------------------|------|------|------|
| Cytosolic liver extract ( $\mu\text{g}$ ) | 0    | 2    | 2    |
| Biotin-IRE RNA (nM)                       | 6.25 | 6.25 | 6.25 |
| Unlabeled IRE RNA ( $\mu\text{M}$ )       | 0    | 0    | 1    |

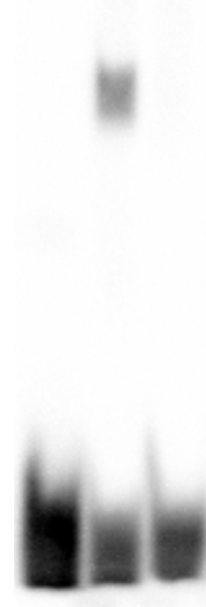

# Supplementary figure 7

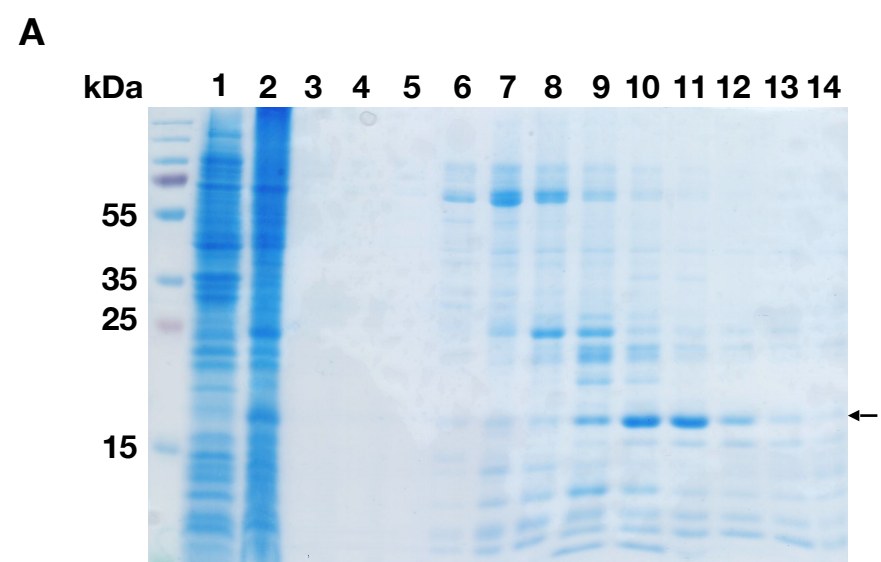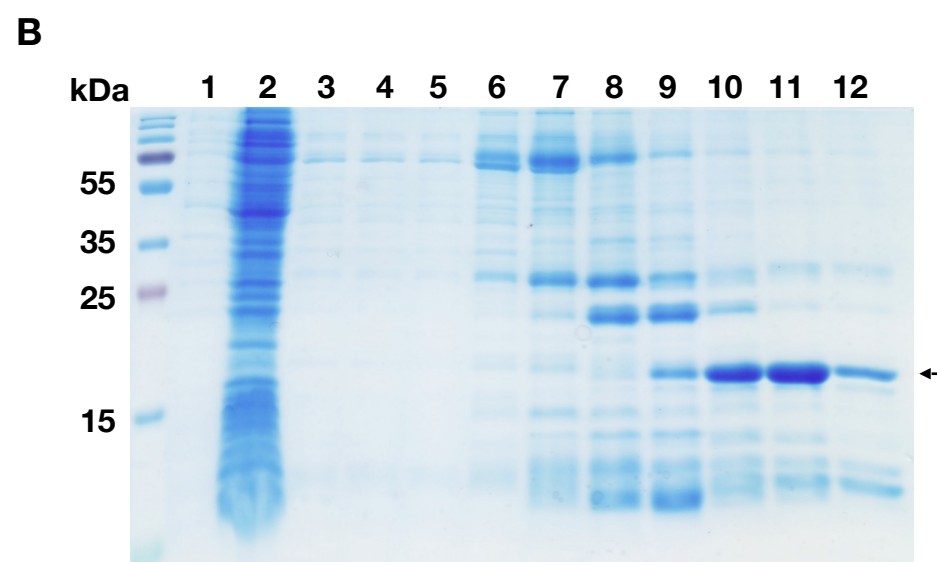

Supplement: ijms-19-03478-s001.pdf [file ijms-19-03478-s001.pdf]
